# Supplementary material for: Electric Field Assisted Femtosecond Laser Preparation of Au@TiO2 Composites with Controlled Morphology and Crystallinity for Photocatalytic Degradation
Source: MDPI journal article supplement (doi:10.3390/ma14143816), 2021-07-08
Supplement: s1 [file s1]

Supplementary Materials

# Electric-Field-Assisted Femtosecond Laser Preparation of Au@TiO<sub>2</sub> Composites with Controlled Morphology and Crystallinity for Photocatalytic Degradation

Xiaojie Li, Xin Li \*, Pei Zuo, Xiaozhe Chen, Misheng Liang and Le Ma

Laser Micro Nanofabricat Lab, Beijing Inst Technol, Beijing 100081, China; xjlj\_08@163.com (X.L.); zuopei1990@163.com (P.Z.); tlz870240502@163.com (X.C.); 3120170227@bit.edu.cn (M.L.); 3120185107@bit.edu.cn (L.M.)

\* Correspondence: lixin02@bit.edu.cn; Tel.: +86-010-68914524

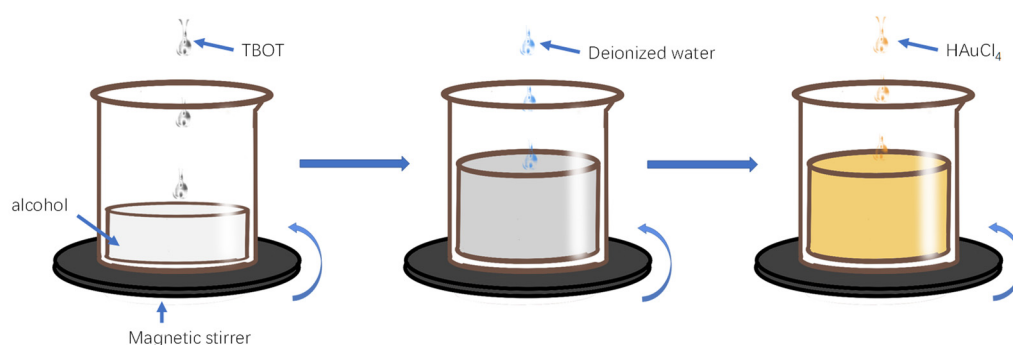

**Figure S1.** Schematic of Au<sup>3+</sup> and TiO<sub>2</sub> hydrate suspension prepared by sol-gel method.

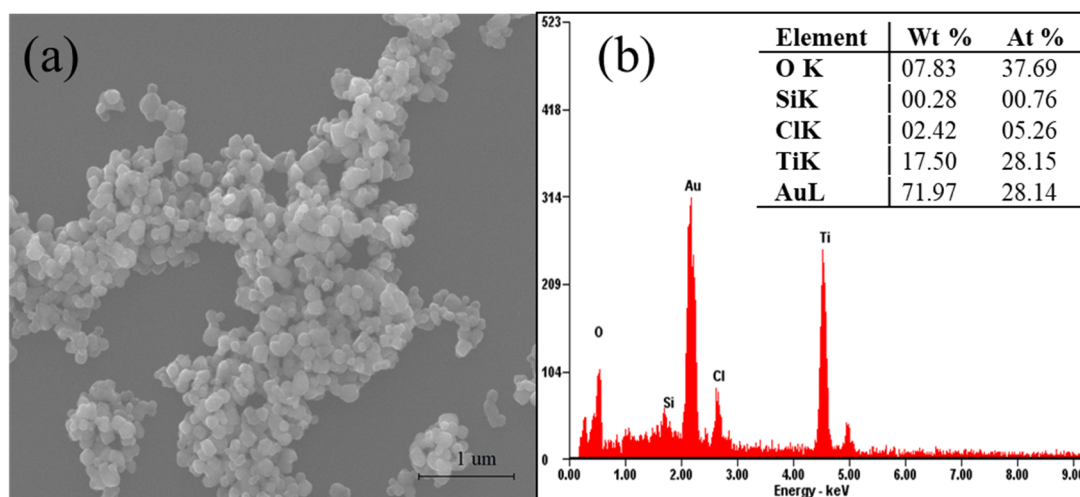

**Figure S2.** (a) SEM image of Au<sup>3+</sup> and TiO<sub>2</sub> hydrate prepared by sol-gel method; (b) The EDS element distribution map of Au<sup>3+</sup> and TiO<sub>2</sub> hydrate suspension.

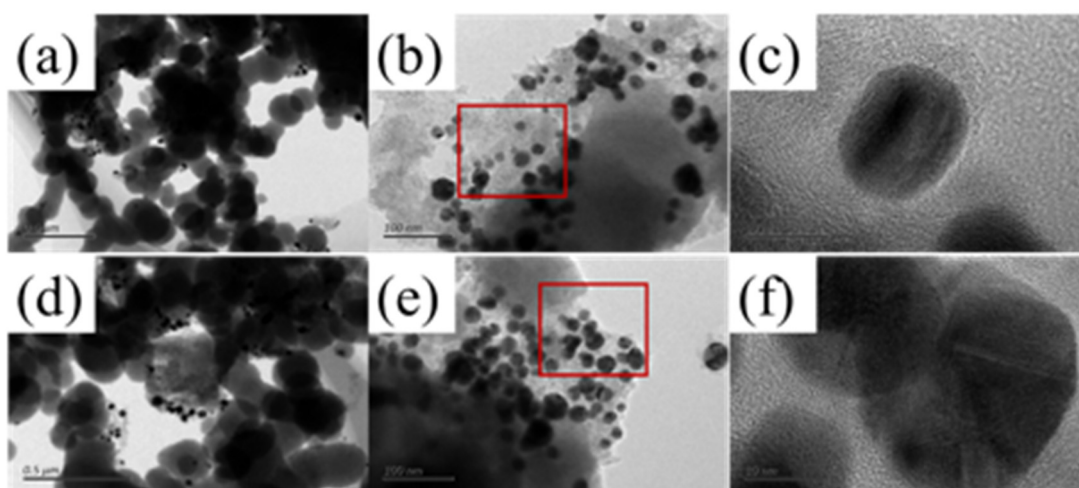

**Figure S3.** (a) The TEM images of AuNPs @a-TiO<sub>2</sub> prepared via femtosecond laser liquid-phase ablation the hydrate suspensions of Au<sup>3+</sup> and TiO<sub>2</sub>; (b) and (c) are the HRTEM images; (d) The TEM images of AuNPs @a-TiO<sub>2</sub> prepared via temporally-shaped femtosecond laser liquid-phase ablation the hydrate suspensions of Au<sup>3+</sup> and TiO<sub>2</sub>; (e) and (f) are the HRTEM images, the scale bars are shown in the lower left corner of the images.

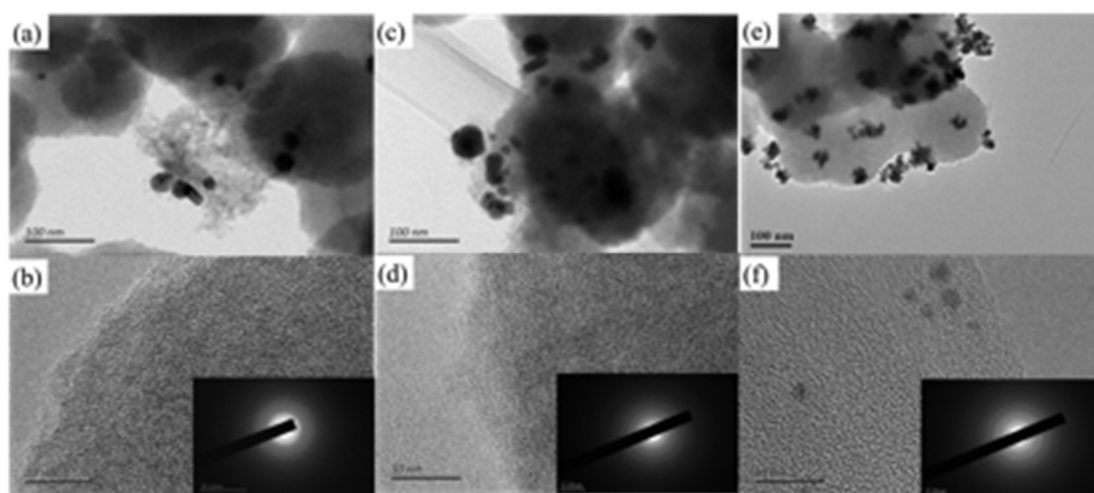

**Figure S4.** (a) The TEM images of AuNPs @a-TiO<sub>2</sub> prepared via femtosecond laser liquid-phase ablation; (b) The HRTEM images of the TiO<sub>2</sub> in (a), the insets of (b) is the diffraction map of the corresponding image positions; (c) The TEM images of AuNPs @a-TiO<sub>2</sub> prepared via temporally-shape femtosecond laser liquid-phase ablation; (d) The HRTEM images of the TiO<sub>2</sub> in (c), the insets of (c) is the diffraction map of the corresponding image positions; (e) The TEM images of AuNCs @mix-TiO<sub>2</sub> prepared via electric-field-assisted femtosecond laser liquid-phase ablation; (f) The HRTEM images of the TiO<sub>2</sub> in (e), the insets of (e) is the diffraction map of the corresponding image positions.
